# Supplementary material for: Brief Communication: Contending estimates of 2003–2008 glacier mass balance over the Pamir–Karakoram–Himalaya
Source: Copernicus journal article supplement (doi:10.5194/tc-9-557-2015), 2015-03-19
Supplement: Supplementary file [file tc-9-557-2015-supplement.pdf]

Supplement of The Cryosphere, 9, 557–564, 2015  
<http://www.the-cryosphere.net/9/557/2015/>  
doi:10.5194/tc-9-557-2015-supplement  
© Author(s) 2015. CC Attribution 3.0 License.

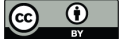

*Supplement of*

**Brief Communication: Contending estimates of 2003–2008  
glacier mass balance over the Pamir–Karakoram–Himalaya**

**A. Kääb et al.**

*Correspondence to:* A. Kääb (kaeab@geo.uio.no)

## Supplement

The gauging stations used for the results shown in Fig. 2 are listed in Tab. S1. Reliable river runoff data are notoriously difficult to obtain over and around the Himalayas. Even if available, their use and distribution are sometimes restricted. As example catchments we select therefore only the ones where discharge data stem from peer-reviewed studies, or where the data were used in peer-reviewed studies, and where the data cover sufficiently long time periods. It is outside the focus of the present brief communication to compile a geographically complete set of catchment discharge data. The uncertainty of the glacier imbalance contribution to river runoff (Fig. 2) is estimated in the same way as the uncertainty of glacier mass changes, but uncertainties in the river runoff data used are neglected.

**Table S1.** Gauging stations indicated in Fig. 2 and uncertainty of our percentage discharge contributions of glacier imbalance to river runoff at  $1\sigma$ -level.

| River       | Gauging station | Annual discharge ( $\text{m}^3 \text{s}^{-1}$ ) | Period of measurements | Source                                                                                           | Uncertainty of percentage discharge contributions |
|-------------|-----------------|-------------------------------------------------|------------------------|--------------------------------------------------------------------------------------------------|---------------------------------------------------|
| Vaksh       | Garm            | 320                                             | 1933-1990              | Global Runoff Data Centre (GRDC)                                                                 | $\pm 5\%$                                         |
| Gilgit      | Gilgit          | 287                                             | 1980-2010              | Mukhopadhyay and Khan (2014)                                                                     | $\pm 2\%$                                         |
| Hunza       | Dainyor Bridge  | 332                                             | 1966-2010              | "                                                                                                | $\pm 2\%$                                         |
| Shigar      | Shigar          | 203                                             | 1985-1998              | "                                                                                                | $\pm 2\%$                                         |
| Astore      | Doyian          | 136                                             | 1974-2009              | "                                                                                                | $\pm 2\%$                                         |
| Upper Indus | Kharmong        | 452                                             | 1982-2010              | "                                                                                                | $\pm 3\%$                                         |
| Shyok       | Yogo            | 362                                             | 1973-2010              | "                                                                                                | $\pm 6\%$                                         |
| Upper Indus | Besham Qila     | 2431                                            | 1969-2010              | "                                                                                                | $\pm 2\%$                                         |
| Chenab      | Prem Nagar      | 626                                             | 1968-1986              | Hofer (1993)                                                                                     | $\pm 3\%$                                         |
| Beas        | Thalout         | 190                                             | 1997-2001              | Liu et al. (2013)                                                                                | $\pm 2\%$                                         |
| Karnali     | Chisapani       | 1350                                            | 1962-1993              | GRDC                                                                                             | $\pm 1\%$                                         |
| Narayani    | Narayangh       | 1590                                            | 1963-2006              | Collins et al. (2013)                                                                            | $\pm 1\%$                                         |
| Sapt Koshi  | Chatara         | 1537                                            | 1977-                  | GRDC                                                                                             | $\pm 1\%$                                         |
| Brahmaputra | Pasighat        | 5870                                            | 1949-1962, 1976-1978   | Sarma (2005)                                                                                     | $\pm 2\%$                                         |
| Amu Darya   | ungauged        | $\sim 2300$                                     | "long-term mean"       | <a href="http://www.cawater-info.net">http://www.cawater-info.net</a> ; Agal'tseva et al. (2011) | $\pm 1\%$                                         |

## Supplemental References

- Agal'tseva, N.A., Bolgov M.V., Spektorman T.Yu., Trubetskova M.D., and Chub V.E. Estimating hydrological characteristics in the Amu Darya River basin under climate change conditions. *Russian Meteorology and Hydrology*. 36(10), 681-689, 2011.
- Collins, D. N., Davenport, J. L. and Stoffel, M.. Climatic variation and runoff from partially-glacierised Himalayan tributary basins of the Ganges. *Science of the Total Environment*, 468, 48-59, 2013.
- GRDC. Global Runoff Data Centre. Composite runoff fields v1.0. <http://www.grdc.sr.unh.edu/index.html>.
- Hofer, T. Himalayan deforestation, changing river discharge, and increasing floods: myth or reality? *Mountain Research and Development*, 213-233, 1993.
- Li Lu, Engelhardt M., Xu Chong-Yu., Jain S. K. and Singh V. P. Comparison of satellite-based and reanalyzed precipitation as input to glacio-hydrological modeling for Beas river basin, Northern India. – Cold and Mountain Region Hydrological Systems Under Climate Change: Towards Improved Projections, Proceedings of H02, IAHS-IAPSO-IASPEI Assembly, July 2013, Gothenburg, Sweden), International Association of Hydrological Sciences (IAHS) Publication number 360, 45-52, 2013.
- Mukhopadhyay, B., and Khan, A.: A quantitative assessment of the genetic sources of the hydrologic flow regimes in Upper Indus Basin and its significance in a changing climate, *J Hydrol*, 509, 549-572, DOI 10.1016/j.jhydrol.2013.11.059, 2014.
- Sarma, J. N. Fluvial process and morphology of the Brahmaputra River in Assam, India. *Geomorphology*, 70(3), 226-256, DOI: 10.1016/j.geomorph.2005.02.007, 2005.
